# Supplementary material
Source: publisher site journal article supplement (https://www.e-cmh.org/upload/media/cmh-2022-0327-Supplementary-Fig-1.pdf)
Supplement: Supplementary file 1 [file cmh-2022-0327-Supplementary-Fig-1.pdf]

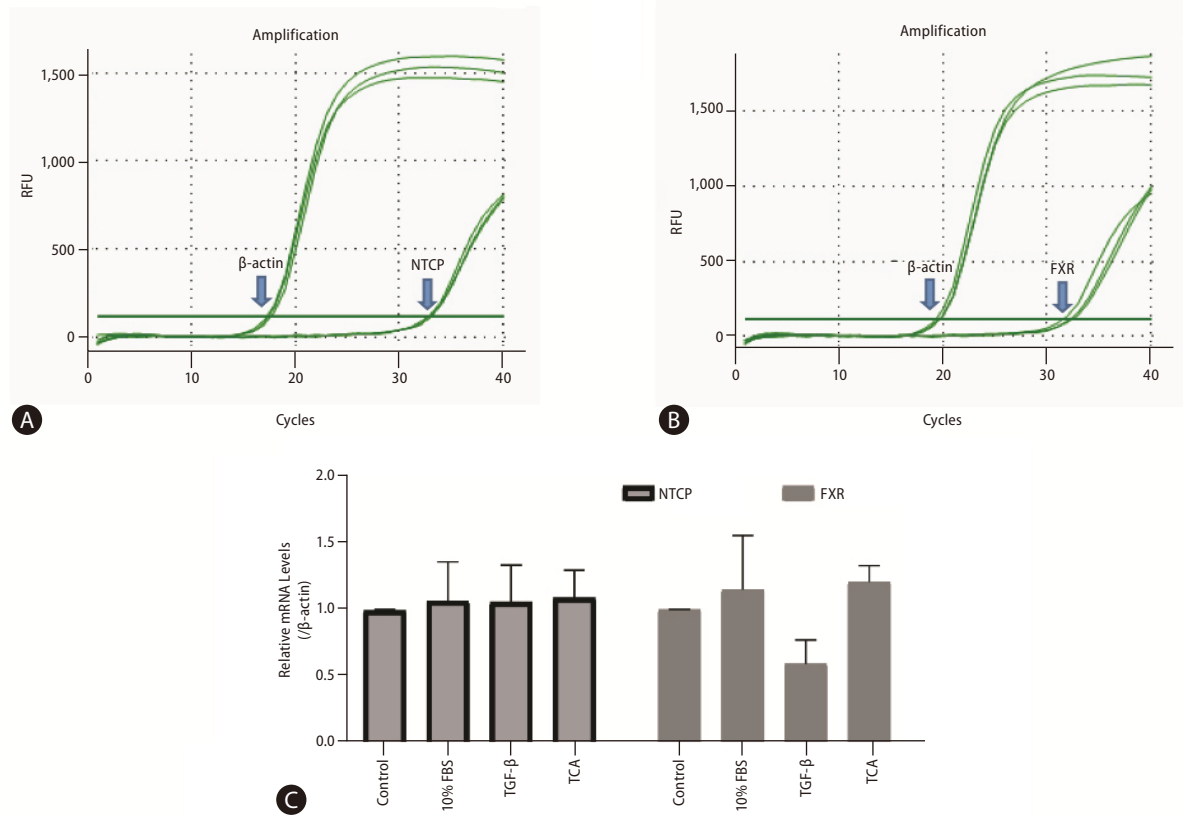

**Supplementary Figure 1.** The expression of bile acid-related receptors NTCP and FXR in HSCs. Amplification plot of NTCP (A) and FXR (B) expression in LX-2 cells by real-time RT-PCR. NTCP and FXR (C) mRNA levels in quiescent and activated LX-2 cells. FXR, farnesoid X receptor; HSCs, hepatic stellate cells; TCA, taurocholic acid; FBS, fetal bovine serum.
